# Supplementary material for: Stretchable conductive nanocomposites of low electrical percolation threshold for washable high-performance-interconnects
Source: Royal Society of Chemistry journal article supplement (doi:10.1039/d2tc04567b), 2023-01-01
Supplement: d2tc04567b1.pdf [file d2tc04567b1.pdf]

## Electronic Supplementary Information

# Stretchable conductive nanocomposites of low electrical percolation threshold for washable high-performance interconnects

Seungho Kwag<sup>1,2,†</sup>, Youngpyo Ko<sup>1,†</sup>, Jun-Young Jeon<sup>1,†</sup>, Doojoon Jang<sup>1</sup>, Minju Park<sup>1</sup>,  
Yoohyeon Choi<sup>1</sup>, Jinhan Cho<sup>2</sup>, and Heesuk Kim<sup>1,3\*</sup>

<sup>1</sup>*Soft Hybrid Materials Research Center, Korea Institute of Science and Technology (KIST),  
Seoul 02792, Republic of Korea.*

<sup>2</sup>*Chemical & Biological Engineering, Korea University, Seoul 02841, Republic of Korea.*

<sup>3</sup>*Division of Energy & Environment Technology, KIST School, Korea University of Science and  
Technology (UST), Seoul 02792, Republic of Korea.*

<sup>†</sup>Authors contributed equally to this work.

\*Corresponding author E-mail address: [heesukkim@kist.re.kr](mailto:heesukkim@kist.re.kr)

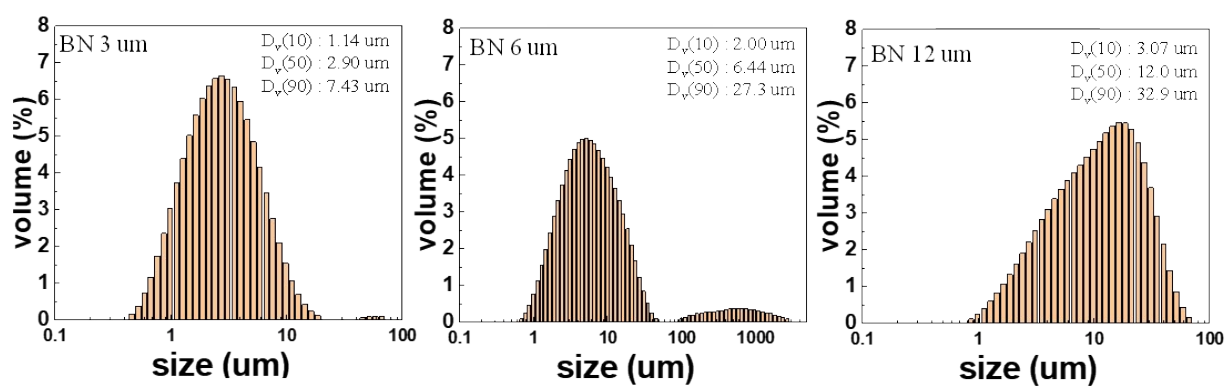

**Fig. S1.** Particle size distribution of h-BN platelets obtained by using a laser diffraction particle size analyzer.

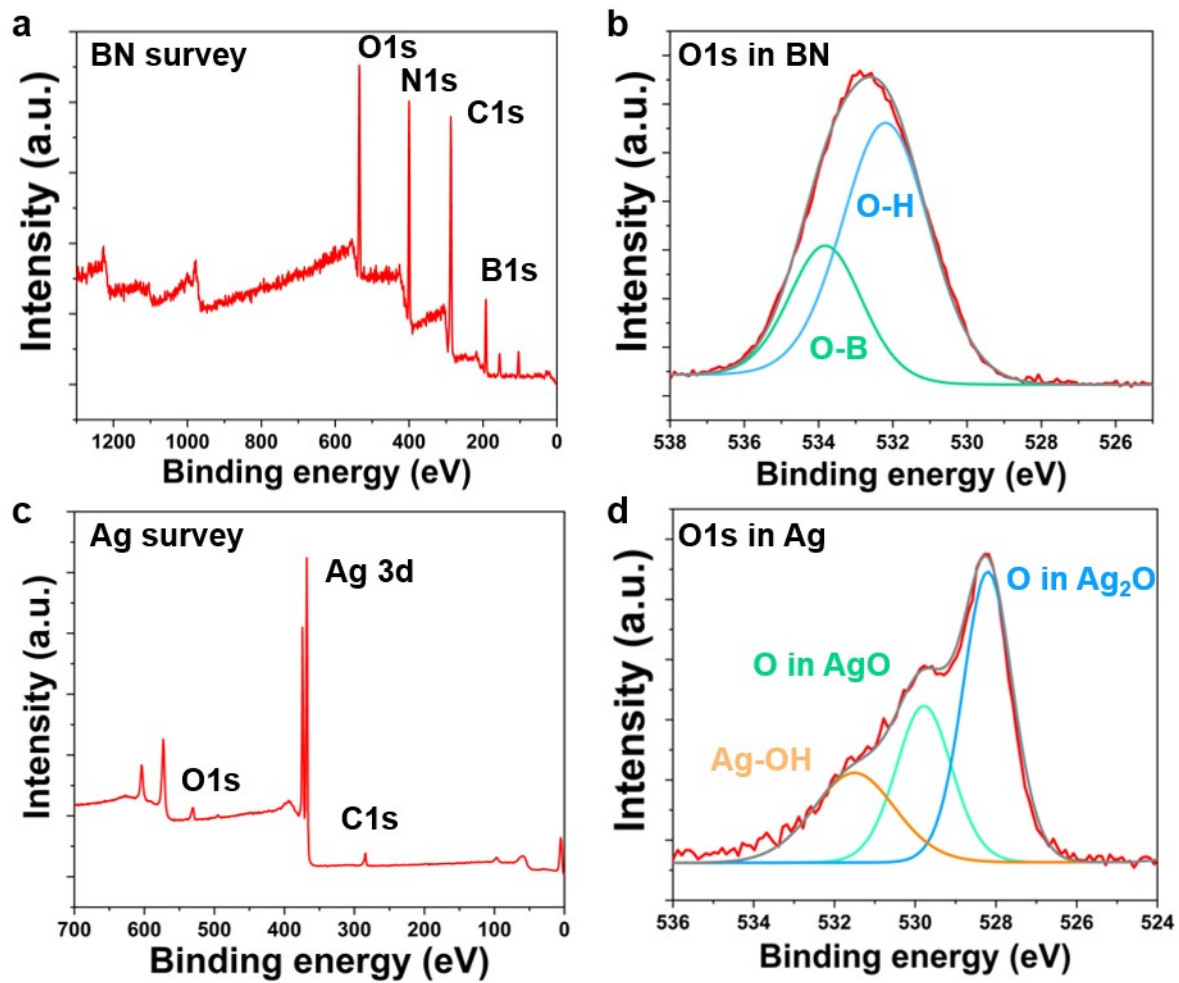

Fig. S2. XPS survey spectra and high-resolution O(1s) peaks of (a, b) *h*-BN platelets and (c, d) Ag particles.

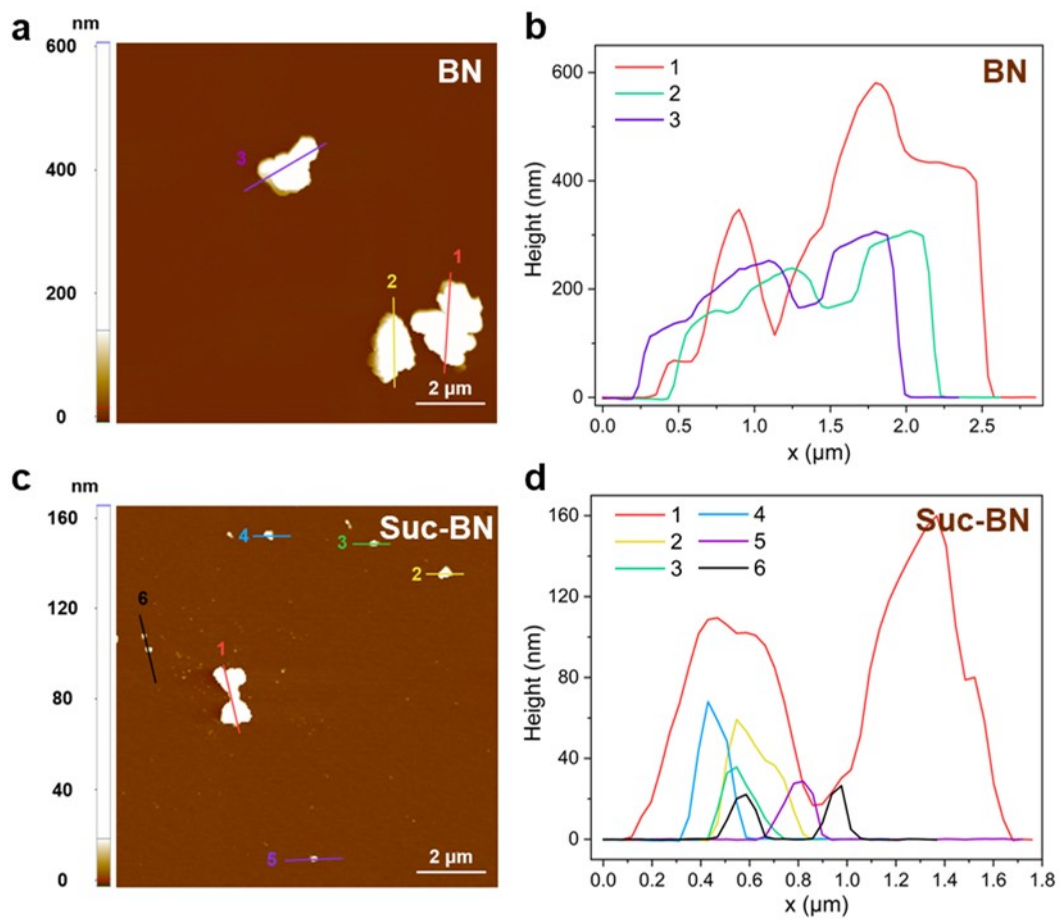

**Fig. S3.** AFM images and height profiles of **(a, b)** pristine *h*-BNs with a diameter of 3  $\mu\text{m}$  and **(c, d)** sucrose-assisted *h*-BNs exfoliated from 3- $\mu\text{m}$  *h*-BNs.

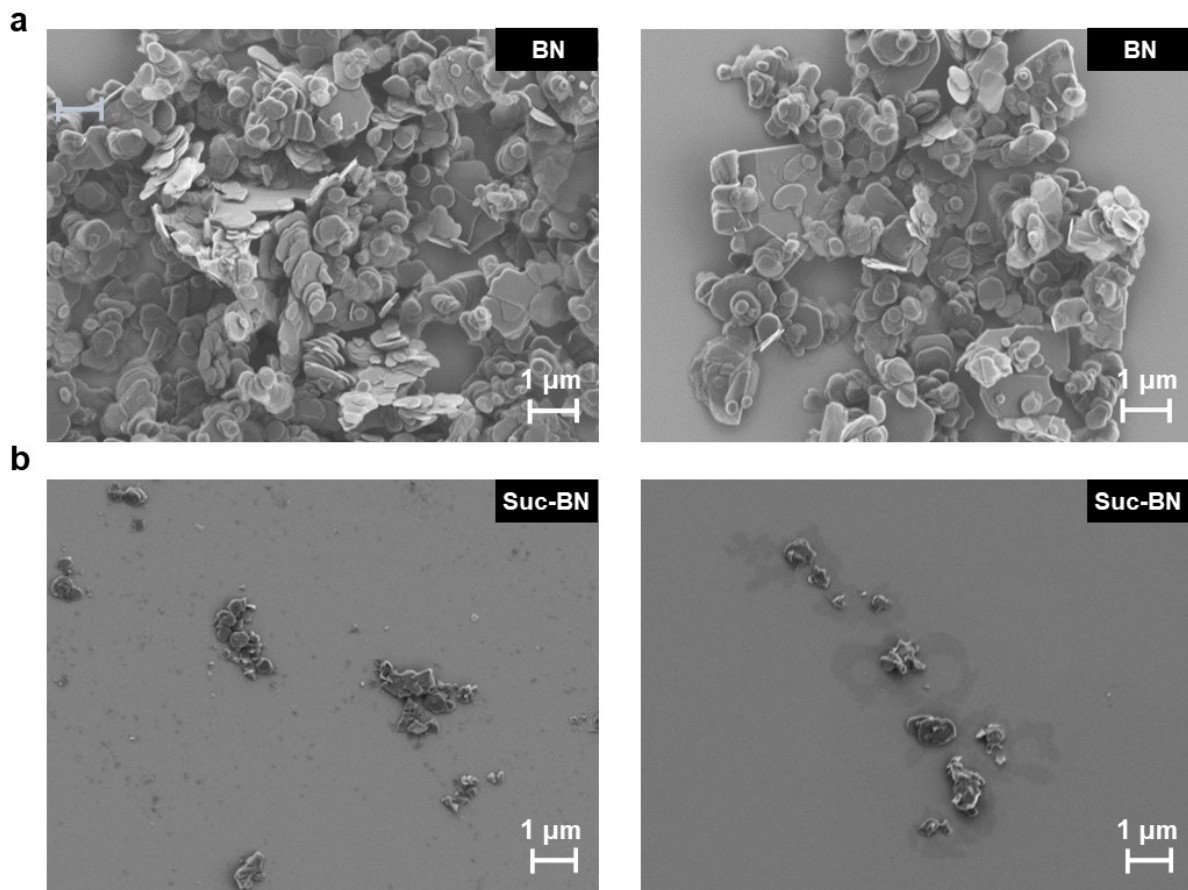

**Fig. S4.** SEM images of **(a)** pristine *h*-BNs with a diameter of 3  $\mu\text{m}$  and **(b)** sucrose-assisted *h*-BNs exfoliated from 3- $\mu\text{m}$  *h*-BNs.

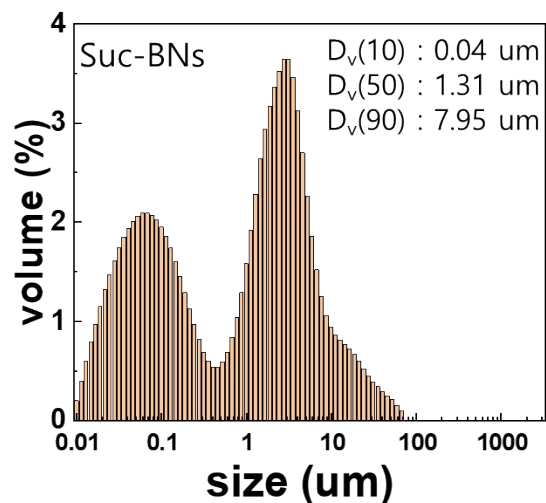

**Fig. S5.** Particle size distribution of suc-BN platelets obtained by using a laser diffraction particle size analyzer.

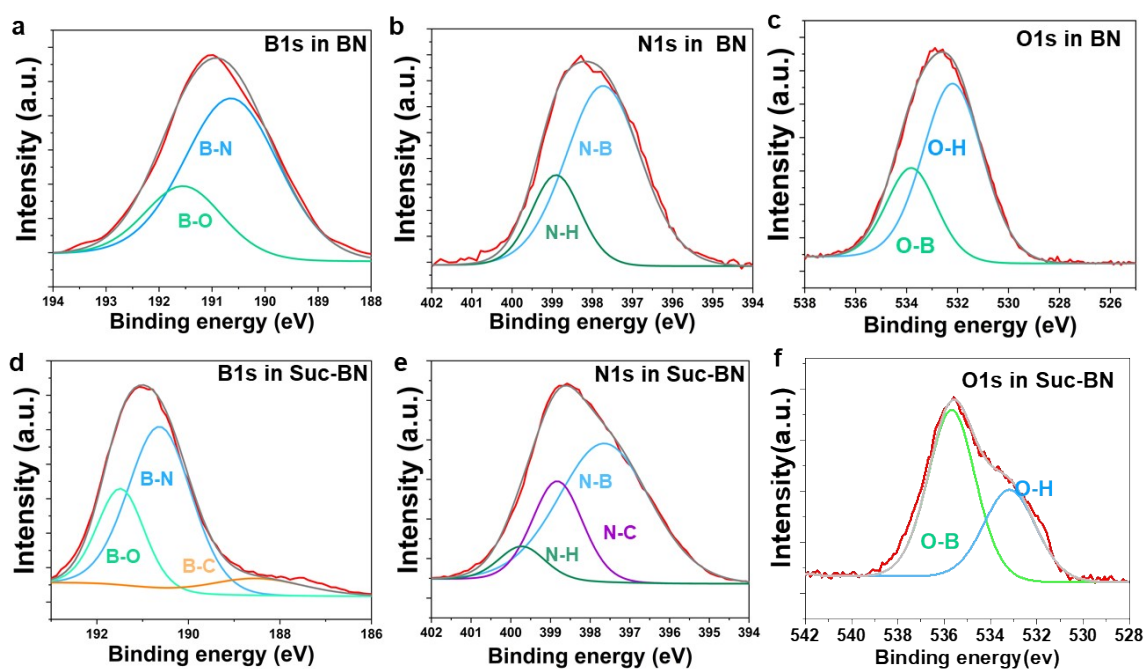

**Fig. S6.** High resolution XPS B(1s) peaks, N(1s) peaks, and O(1s) peaks of **(a-c)** pristine *h*-BN platelets and **(d-f)** sucrose-assisted *h*-BNs.

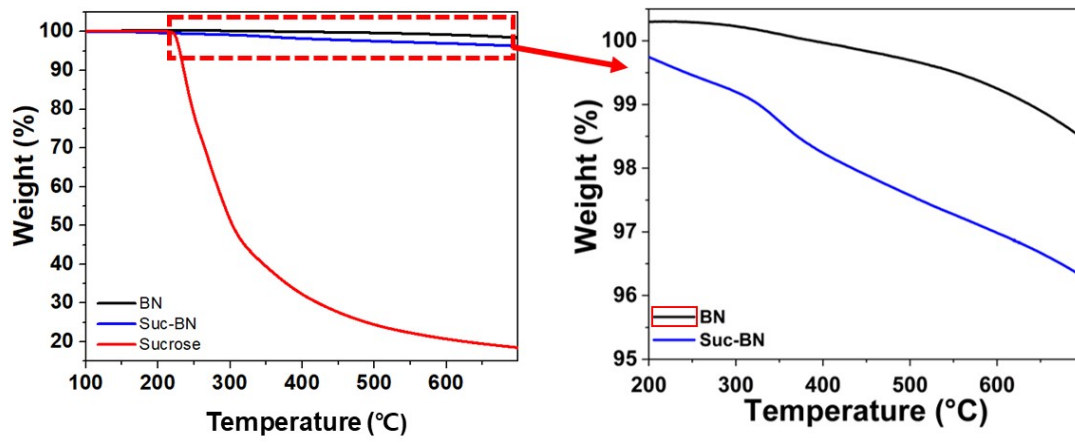

**Fig. S7.** TGA spectra of the pristine BNs, suc-BNs, and sucrose.



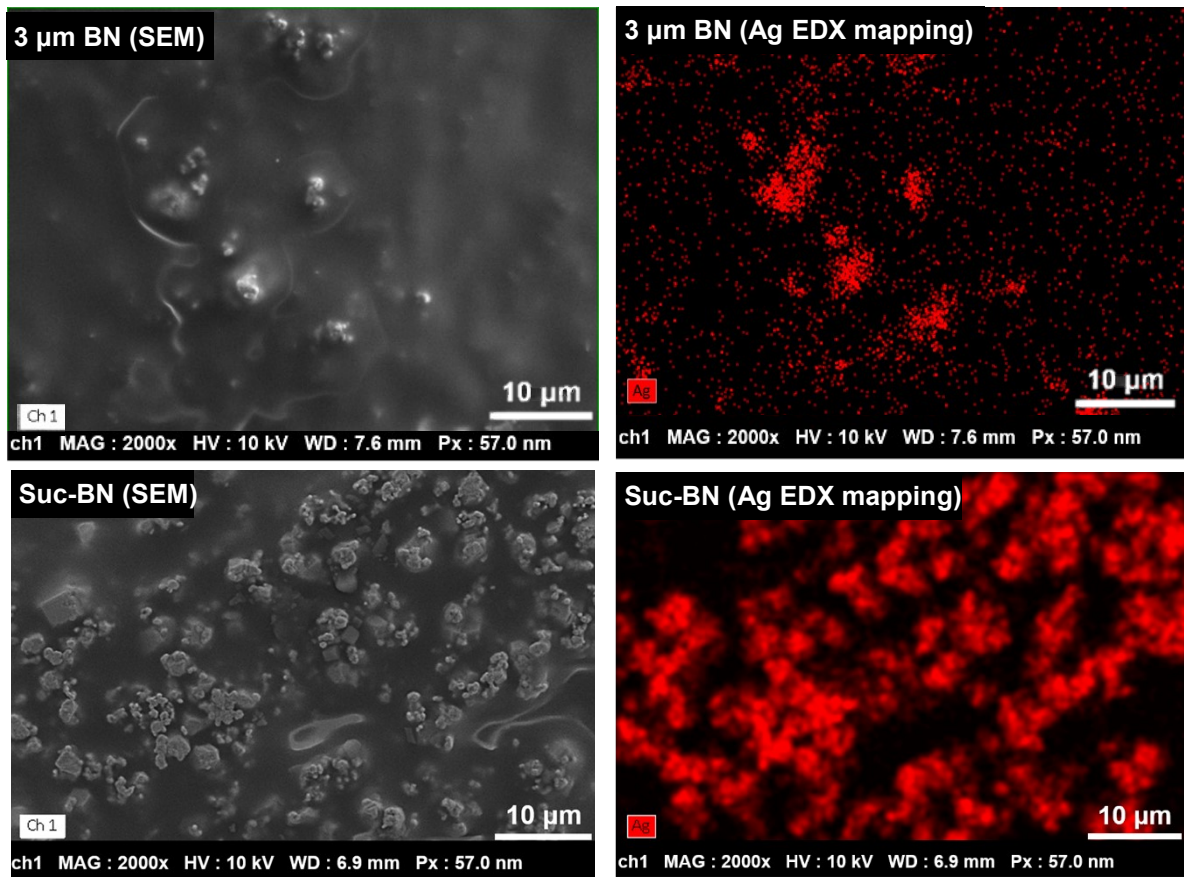

**Fig. S8.** SEM images and EDX Ag mapping of the Ag/silicone adhesives with 60 wt% Ag content:

(a, c) pristine 3- $\mu\text{m}$  BNs (7 phr) and (b, d) suc-BNs (3 phr). All scale bars indicate 10  $\mu\text{m}$ .

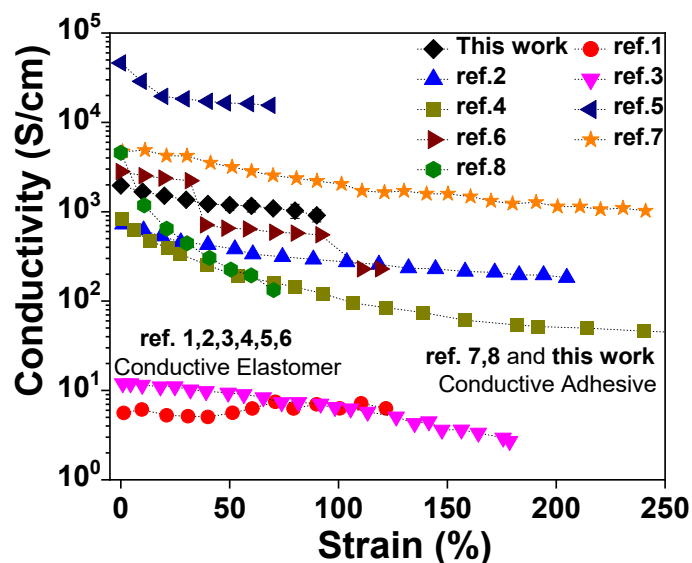

**Fig. S9.** Comparison of this work to recent works on conductive elastomers and conductive adhesives.

#### <Figure S7 References>

1. T. Sekitani, H. Nakajima, H. Maeda, T. Fukushima, T. Aida, K. Hata and T. Someya, *Nat. mater.*, 2009, **8(6)**, 494-499 (conductive filler: SWCNTs).
2. N. Matsuhisa, M. Kaltenbrunner, T. Yokota, H. Jinno, K. Kuribara, T. Sekitani and T. Someya, *Nat. commun.*, 2015, **6(1)**, 7461 (conductive filler: Ag flakes).
3. H. Stoyanov, M. Kollosche, S. Risse, R. Waché and G. Kofod, *Adv. Mater.*, 2013, **25(4)**, 578-583 (conductive filler: polyaniline).
4. Y. Kim, J. Zhu, B. Yeom, M. D. Prima, X. Su, J. -G. Kim, S. J. Yoo, C. Uher and N. A. Kotov, *Nature*, 2013, **500(7460)**, 59-63 (conductive filler: gold nanoparticles).
5. J. Liang, K. Tong and Q. Pei, *Adv. Mater.*, 2016, **28(28)**, 5986-5996 (conductive filler: Ag nanowires).
6. K. -Y. Chun, Y. Oh, J. Rho, J. -H. Ahn, Y. -J. Kim, H. R. Choi and S. Baik, *Nat. Nanotechnol.*, 2010, **5(12)**, 853-857 (conductive filler: SWCNTs and Ag nanoparticles).
7. Z. Li, T. Le, Z. Wu, Y. Yao, L. Li, M. Tentzeris, K.-S. Moon and C. P. Wong, *Adv. Funct. Mater.*, 2015, **25(3)**, 464-470 (conductive filler: Ag flakes).
8. R. Ma, B. Kang, S. Cho, M. Choi and S. Baik, *ACS Nano*, 2015, **9(11)**, 10876-10886 (conductive filler: Ag nanoflowers).

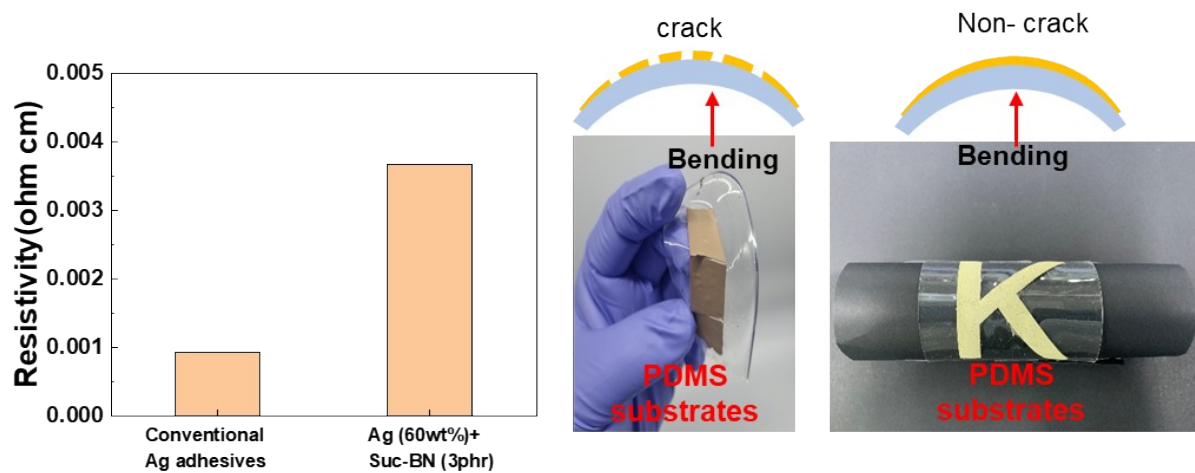

**Fig. S10.** Comparison of the stretchable conductive adhesives to conventional epoxy-based Ag adhesives.
